# Supplementary material for: Solved? The reductive radiation chemistry of alanine
Source: Royal Society of Chemistry journal article supplement (doi:10.1039/c3cp54441a), 2013-11-28
Supplement: c3cp54441a.pdf [file c3cp54441a.pdf]

|            | <b>a2a<sup>down</sup></b> |                           |       | <b>a2a<sup>down</sup> (route b)</b> |                           |       | <b>a2a<sup>down</sup> (route c)</b> |                           |       | <b>a2a<sup>up</sup> (route a)</b> |                           |       | <b>a2a<sup>up</sup> (route b)</b> |                           |       | <b>a2a<sup>up</sup> (route c)</b> |                           |       |
|------------|---------------------------|---------------------------|-------|-------------------------------------|---------------------------|-------|-------------------------------------|---------------------------|-------|-----------------------------------|---------------------------|-------|-----------------------------------|---------------------------|-------|-----------------------------------|---------------------------|-------|
|            | <i>A</i> <sub>iso</sub>   | <i>A</i> <sub>aniso</sub> | Angle | <i>A</i> <sub>iso</sub>             | <i>A</i> <sub>aniso</sub> | Angle | <i>A</i> <sub>iso</sub>             | <i>A</i> <sub>aniso</sub> | Angle | <i>A</i> <sub>iso</sub>           | <i>A</i> <sub>aniso</sub> | Angle | <i>A</i> <sub>iso</sub>           | <i>A</i> <sub>aniso</sub> | Angle | <i>A</i> <sub>iso</sub>           | <i>A</i> <sub>aniso</sub> | Angle |
| C1         | 214.1                     | -63.7                     | 28    | 231.5                               | -58.5                     | 80    | 230.4                               | -60.6                     | 89    | 184.7                             | -67.3                     | 26    | 227.2                             | -55.0                     | 82    | 234.1                             | -58.0                     | 72    |
|            |                           | -62.3                     | 59    |                                     | -57.8                     | 5     |                                     | -59.9                     | 6     |                                   | -66.1                     | 59    |                                   | -54.1                     | 22    |                                   | -56.9                     | 27    |
|            |                           | 126.0                     | 13    |                                     | 116.3                     | 12    |                                     | 120.5                     | 15    |                                   | 133.5                     | 20    |                                   | 109.1                     | 28    |                                   | 114.8                     | 26    |
| H $\alpha$ | 50.1                      | -4.8                      | 21    | 42.3                                | -4.7                      | 23    | 51.3                                | -4.5                      | 25    | 40.0                              | -6.2                      | 87    | 17.1                              | -6.2                      | 88    | 23.5                              | -6.5                      | 85    |
|            |                           | -3.1                      | 22    |                                     | -3.2                      | 26    |                                     | -3.0                      | 28    |                                   | -4.2                      | 88    |                                   | -3.7                      | 89    |                                   | -4.0                      | 81    |
|            |                           | 7.9                       | 7     |                                     | 7.9                       | 14    |                                     | 7.5                       | 13    |                                   | 10.3                      | 21    |                                   | 9.8                       | 19    |                                   | 10.5                      | 20    |
| H(O)       | 43.4                      | -11.0                     | 10    |                                     | -7.0                      | 69    |                                     | -6.6                      | 43    |                                   | -6.7                      | 13    |                                   | -7.1                      | 75    |                                   | -8.0                      | 42    |
|            |                           | -6.2                      | 10    |                                     | -5.4                      | 28    | 29.1                                | -3.9                      | 43    | 96.8                              | -5.8                      | 25    | -1.3                              | -5.0                      | 32    | 4.0                               | -5.6                      | 45    |
|            |                           | 17.2                      | 5     |                                     | 12.4                      | 68    |                                     | 10.5                      | 4     |                                   | 12.5                      | 23    |                                   | 12.1                      | 78    |                                   | 13.6                      | 18    |
| g          |                           | 2.0020                    | 26    |                                     | 2.0020                    | 29    |                                     | 2.0020                    | 28    |                                   | 2.0020                    | 17    |                                   | 2.0020                    | 6     |                                   | 2.0020                    | 10    |
|            | 2.0036                    | 2.0042                    | 42    | 2.0036                              | 2.0041                    | 87    | 2.0036                              | 2.0041                    | 62    | 2.0036                            | 2.0041                    | 32    | 2.0036                            | 2.0043                    | 49    | 2.0037                            | 2.0043                    | 31    |
|            |                           | 2.0046                    | 48    |                                     | 2.0047                    | 81    |                                     | 2.0046                    | 59    |                                   | 2.0046                    | 36    |                                   | 2.0046                    | 49    |                                   | 2.0048                    | 31    |

*Table SI-1*

Comparison between the EPR data of radical species **a2a** (see also Table 1) and calculated properties for all radical models on ‘up’ and ‘down’ sides. Isotropic (*A*<sub>iso</sub>) and anisotropic hyperfine couplings (*A*<sub>aniso</sub>) are in MHz. Principal directions are given with respect to the orthogonal crystallographic axes <abc>. The last column indicates the angle (in degrees) between corresponding experimental and calculated eigenvector directions.

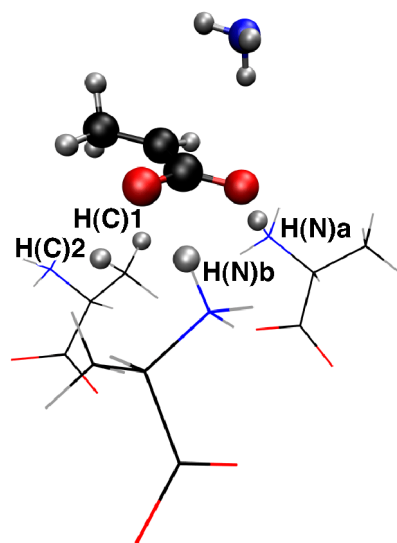

*Figure SI-1*

Indication of protons in radical model **a3a<sup>3</sup>** that give rise to the long-range dipolar hyperfine couplings reported in Table 2.

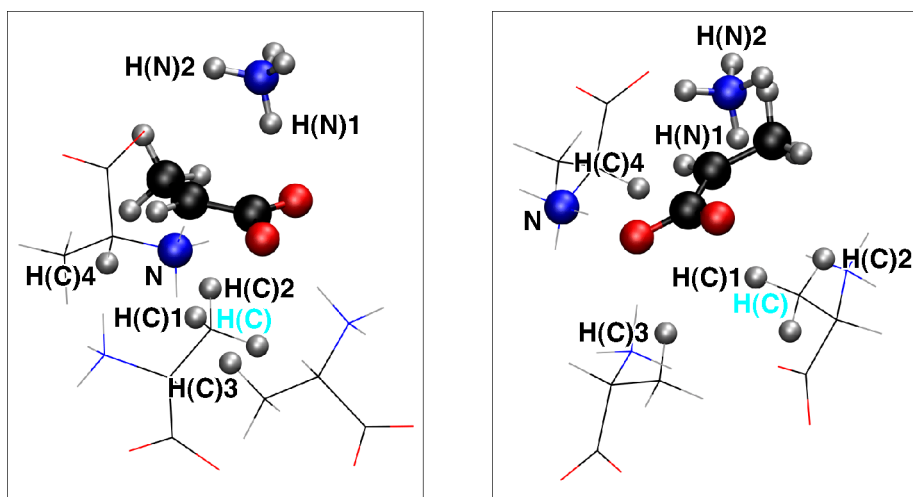

*Figure SI-2*

Two views of radical model **a4a**<sup>2</sup> in which protons have been indicated that give rise to the long-range dipolar hyperfine couplings reported in Table 3.

## Radiation chemistry of alanine

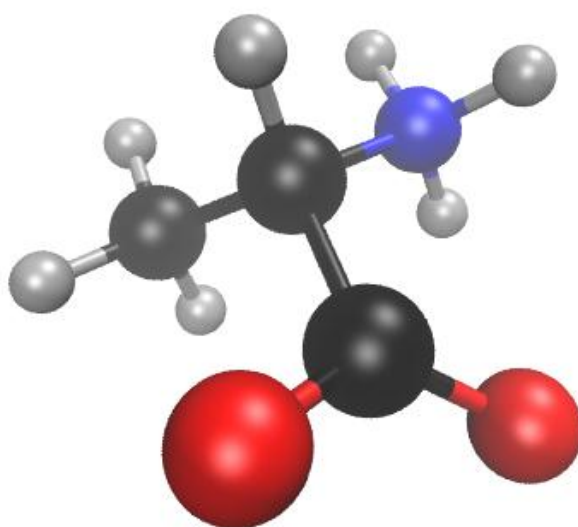

### *Movie SI-1*

An animation with voice-over illustrating the events taking place in the reductive radiation chemistry of alanine, as outlined in this paper.
